# Supplementary material for: From hexafluoropropylene to perfluoroisobutyronitrile via high-yield and scalable three-step synthesis
Source: Royal Society of Chemistry journal article supplement (doi:10.1039/d5ra03945b), 2025-01-01
Supplement: d5ra03945b1.pdf [file d5ra03945b1.pdf]

## *Supporting Information*

### **From Hexafluoropropylene to Perfluoroisobutyronitrile via High-Yield and Scalable Three-Step Synthesis**

Li Dong,<sup>a</sup> Qin Guo,<sup>b</sup> Xiaoqing Jia,<sup>b</sup> Qingmin Ji,<sup>c</sup> and Hengdao Quan<sup>\*a</sup>

<sup>a.</sup> *School of Chemistry and Chemical Engineering, Beijing Institute of Technology, 5 South Zhongguancun Street, Haidian District, Beijing, 100081, China. E-mail: [quanhengdao@bit.edu.cn](mailto:quanhengdao@bit.edu.cn)*

<sup>b.</sup> *Quanzhou Yuji Advanced Materials Co., Ltd., Quanzhou 362804, China*

<sup>c.</sup> *Herbert Gleiter Institute of Nanoscience, School of Materials Science and Engineering, Nanjing University of Science and Technology, 200 Xiaolingwei, Nanjing, 210094, China.*

\*Corresponding author: [quanhengdao@bit.edu.cn](mailto:quanhengdao@bit.edu.cn)

## Additional Data

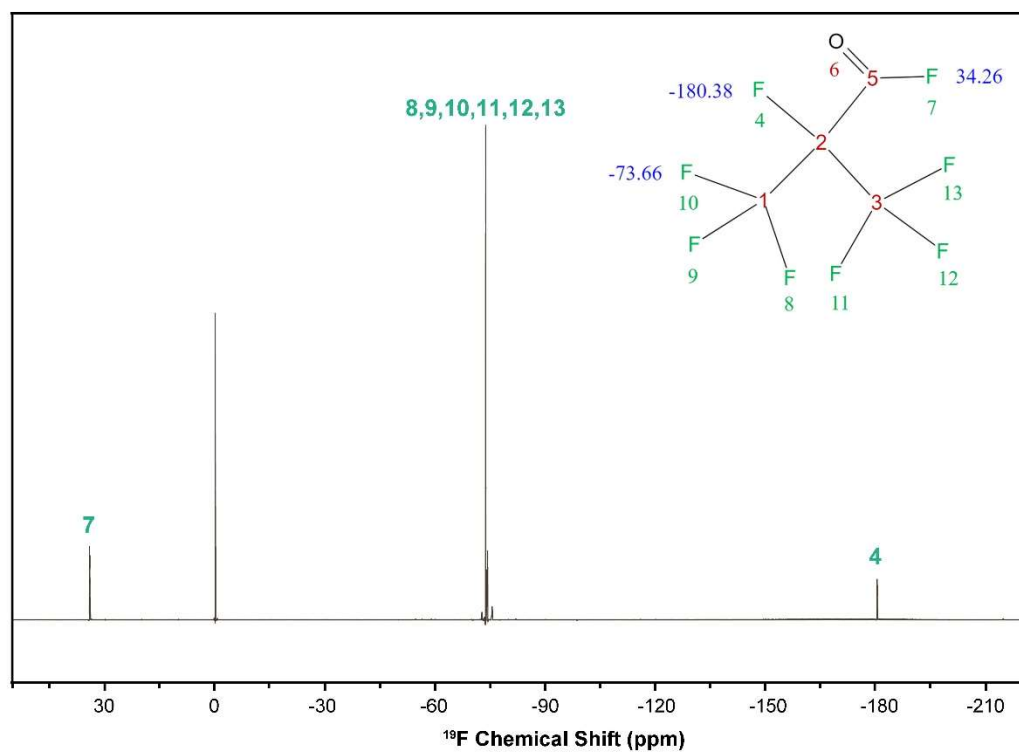

**Figure S1.**  $^{19}\text{F}$  NMR spectrum of perfluoroisobutyryl fluoride

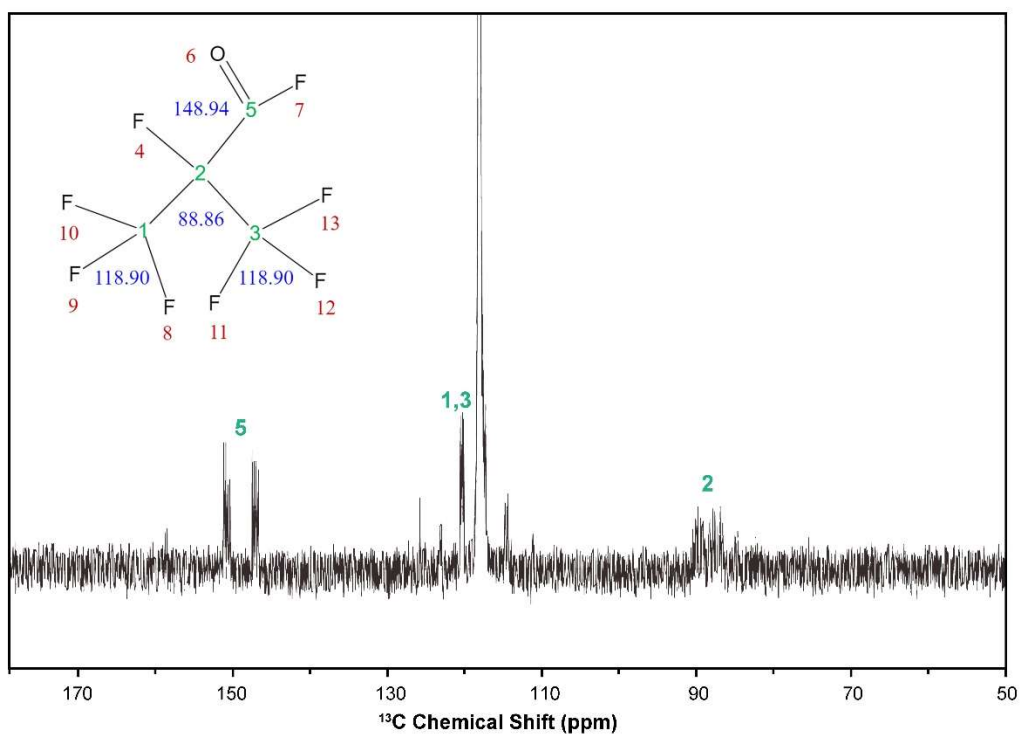

**Figure S2.**  $^{13}\text{C}$  NMR spectrum of perfluoroisobutyryl fluoride

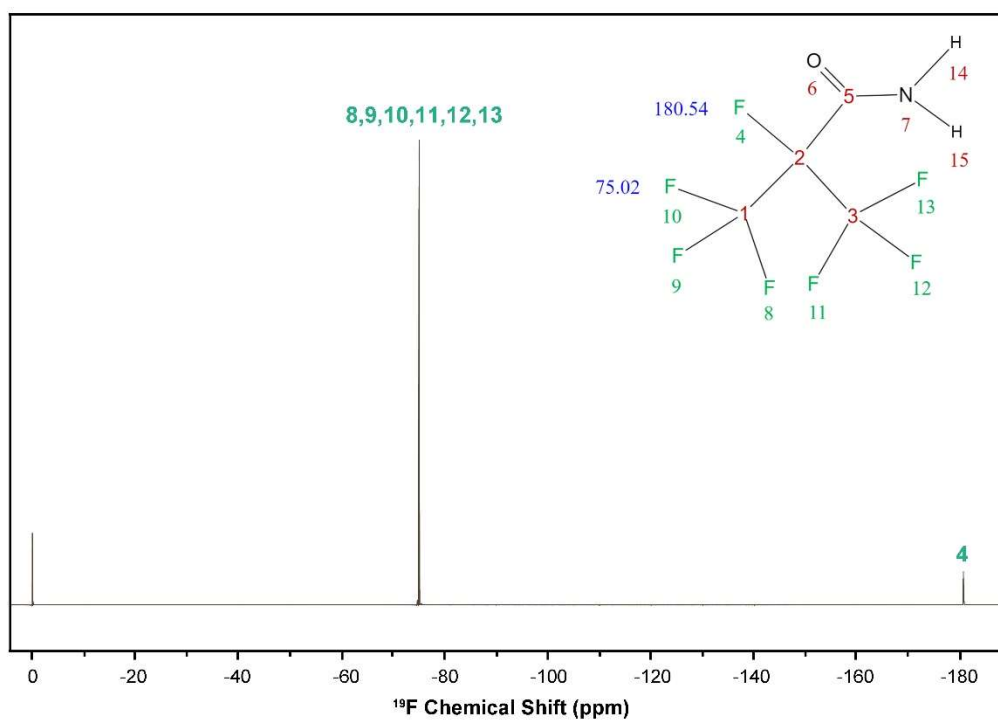

**Figure S3.**  $^{19}\text{F}$  NMR spectrum of heptafluoroisobutyramide

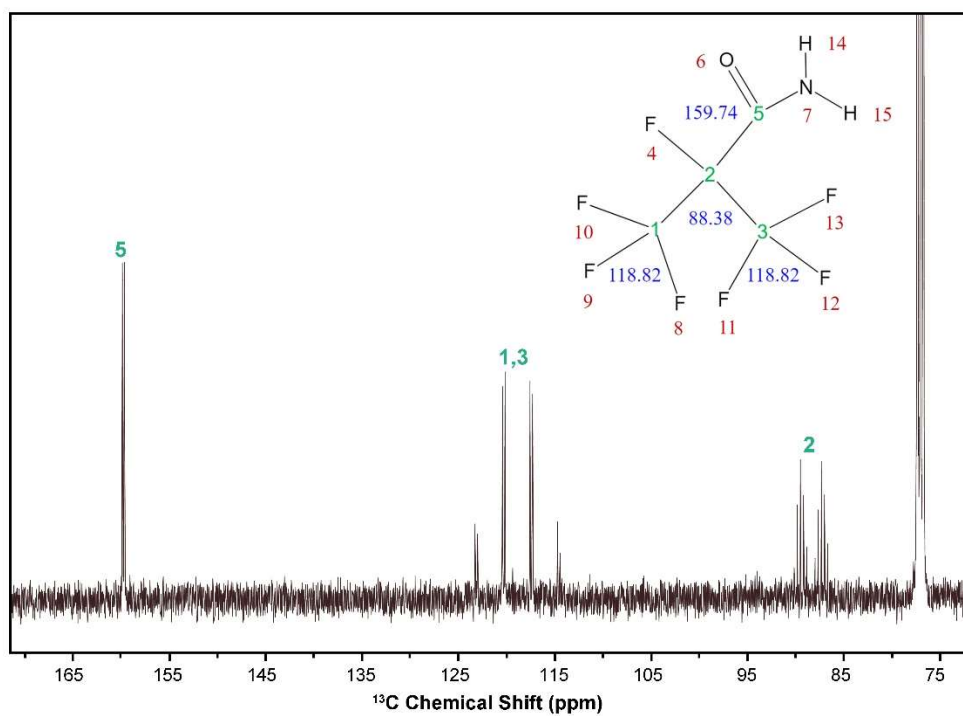

**Figure S4.**  $^{13}\text{C}$  NMR spectrum of heptafluoroisobutyramide

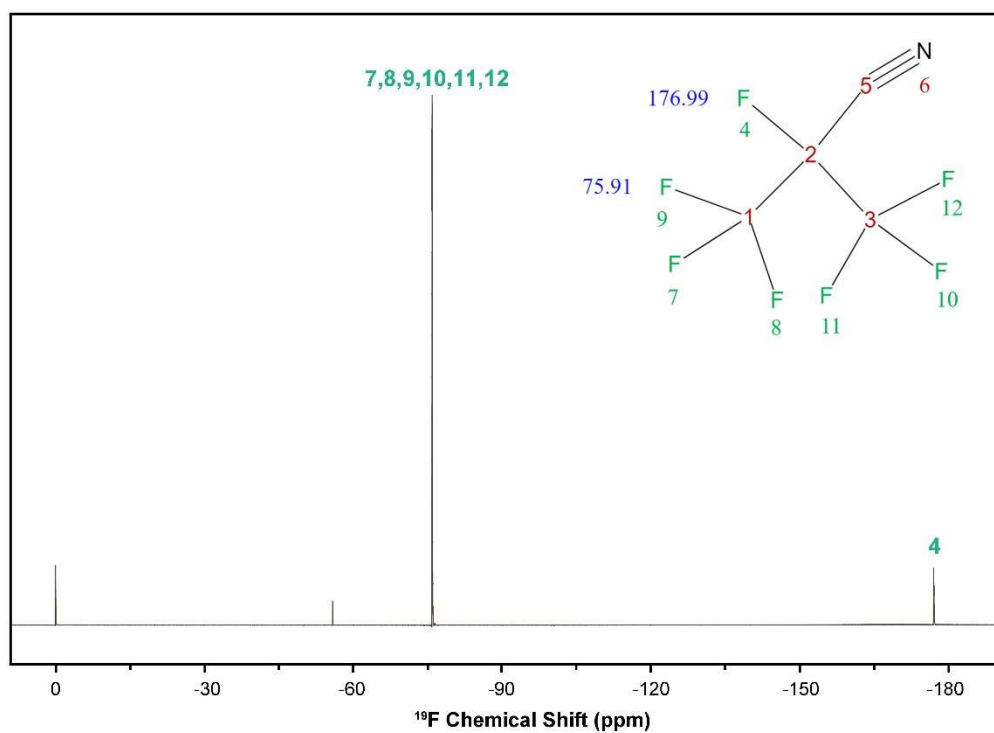

**Figure S5.**  $^{19}\text{F}$  NMR spectrum of perfluoroisobutyronitrile

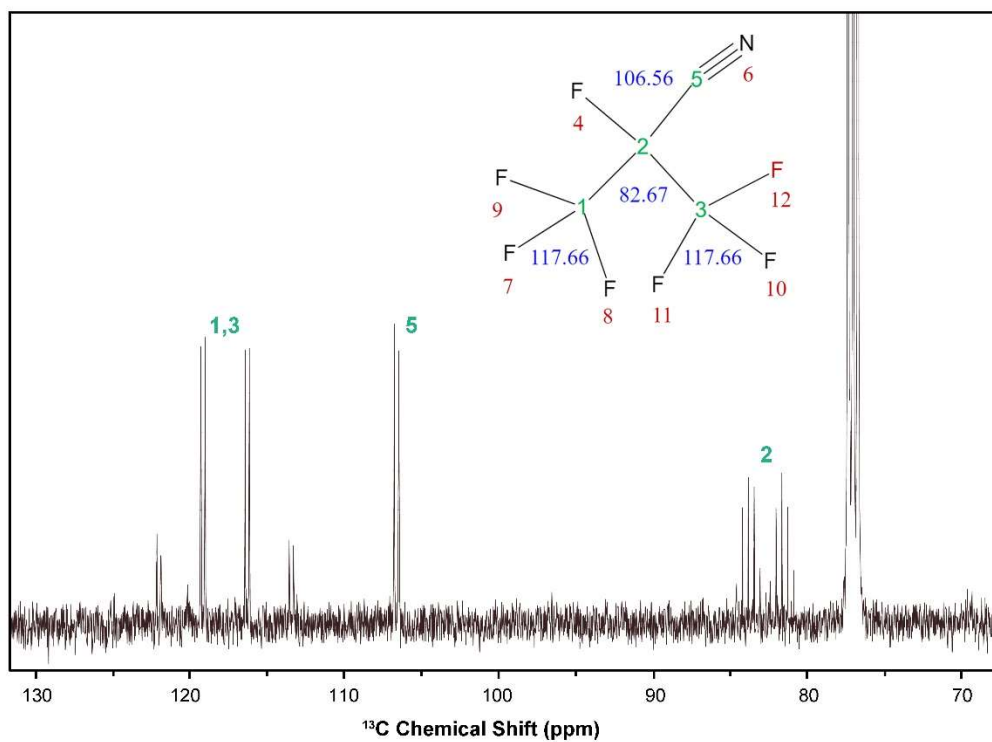

**Figure S6.**  $^{13}\text{C}$  NMR spectrum of perfluoroisobutyronitrile

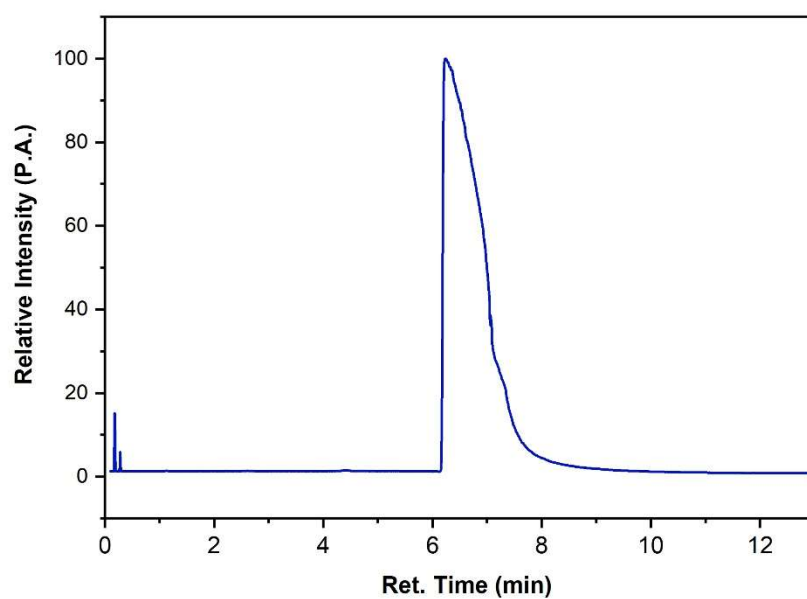

**Figure S7.** GC spectrum of perfluoroisobutyronitrile

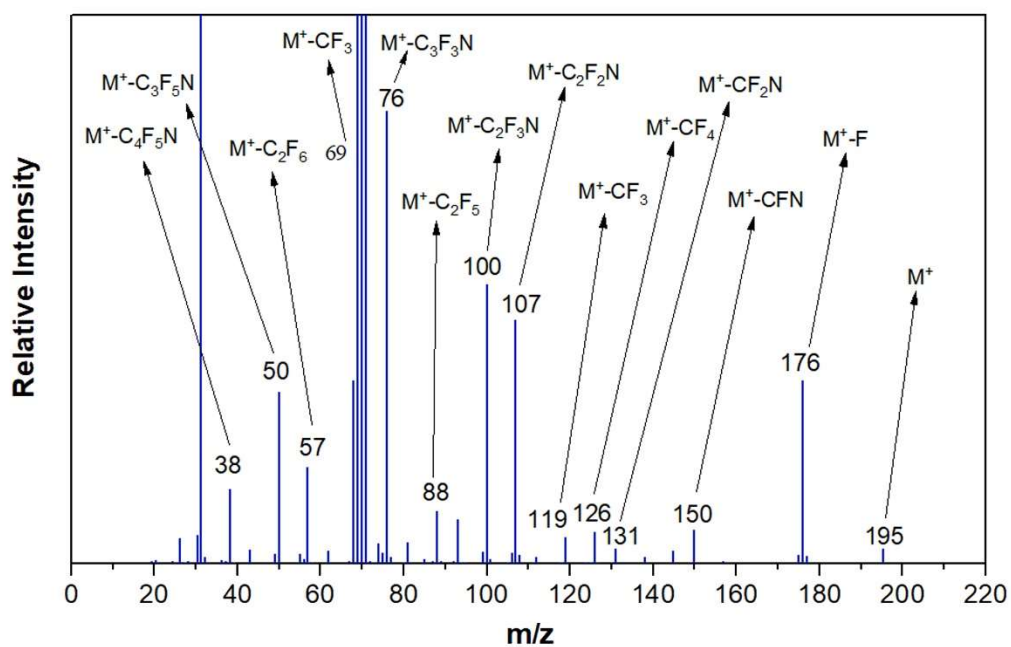

**Figure S8.** MS spectrum of perfluoroisobutyronitrile

**Table S1.** The reaction efficiency of heptafluoroisobutyramide dehydration at varying P<sub>2</sub>O<sub>5</sub> feed ratios

| SN | n(heptafluoroisobutyramide)<br>/n(P <sub>2</sub> O <sub>5</sub> ) | Yield/% | Purity/% |
|----|-------------------------------------------------------------------|---------|----------|
| 1  | 1/1                                                               | 20.3    | 99.6     |
| 2  | 1/2                                                               | 57.0    | 99.5     |
| 3  | 1/3                                                               | 84.1    | 99.7     |
| 4  | 1/5                                                               | 90.0    | 99.9     |
